# Supplementary material for: Identifying Frail-Related Biomarkers among Community-Dwelling Older Adults in Japan: A Research Example from the Japanese Gerontological Evaluation Study
Source: Hindawi journal article supplement (doi:10.1155/2018/5362948), 2018-01-01
Supplement: f1 [file 5362948.f1.pdf]

Supplementary Table 1. Clinical normal range utilised to group clinical biomarkers obtained from the Japanese study participants.

| <b>Biomarkers (Unit)</b>                       |                            |                                    |
|------------------------------------------------|----------------------------|------------------------------------|
| HbA1c (%)                                      | Below normal               | Male: <4.97; Female: <5.11         |
|                                                | Normal                     | Male: 4.97-6.03; Female: 5.11-6.20 |
|                                                | Above normal               | Male: >6.03; Female: >6.20         |
| HDL (mg/dL)                                    | Below normal               | Male: <38; Female: < 48            |
|                                                | Normal                     | Male: 38-90; Female: 48-103        |
|                                                | Above normal               | Male: >90; Female: >103            |
| LDL (mg/dL) <sup>a</sup>                       | Below normal               | <65                                |
|                                                | Normal                     | 65-163                             |
|                                                | Above normal               | >163                               |
| Triglyceride (mg/dL)                           | Below normal               | Male: < 39; Female: <32            |
|                                                | Normal                     | Male: 39-198; Female: 32-134       |
|                                                | Above normal               | Male: >198; Female: >134           |
| Haemoglobin (g/dL)                             | Below normal               | Male: < 13.7; Female: <11.9        |
|                                                | Normal                     | Male: 13.7-16.4; Female: 11.9-14.6 |
|                                                | Above normal               | Male: >16.4; Female: >14.6         |
| Serum albumin (g/dL)                           | Lower abnormal             | Male: <3.9; Female: <4.0           |
|                                                | Normal                     | Male: 3.9-4.7; Female: 4.0-4.8     |
|                                                | Above normal               | Male: >4.7; Female: >4.8           |
| Creatinine (mg/dL)                             | Below normal               | Male: <0.66; Female: <0.47         |
|                                                | Normal                     | Male: 0.66-1.08; Female: 0.47-0.82 |
|                                                | Above normal               | Male: >1.08; Female: >0.82         |
| Uric acid (mg/dL)                              | Below normal               | Male: <3.6; Female: <2.6           |
|                                                | Normal                     | Male: 3.6-7.9; Female: 2.6-5.9     |
|                                                | Above normal               | Male: >7.9; Female: >5.9           |
| Urine                                          | Protein: Negative          | (-)                                |
|                                                | Protein: Trace or Positive | (±, +, 2+, 3+, 4+)                 |
|                                                |                            |                                    |
| eGFR (ml/min/1.73m <sup>2</sup> ) <sup>b</sup> | Below normal               | <60                                |
|                                                | Normal                     | ≥60                                |

<sup>a</sup> No sex-specific clinical normal range.

<sup>b</sup> Derived using the sex-specific formula: Male =  $194 \times \text{Creatinine}^{-1.09} \times \text{Age}^{-0.28}$ ; Female =  $194 \times \text{Creatinine}^{-1.09} \times \text{Age}^{-0.28} - 0.739$

Supplement Table 2: Validation of the score obtained from the Study of Osteoporotic Fractures (SOF) Frailty Index by testing an association with the previous experiences of fall among the study participants of JAGES 2010 who were not living in the municipalities with the health screening data (N= 66,609).

|                       | <b>Robust</b><br>(n=28,198) |                    | <b>Intermediate</b><br>(n=27,380) |                       | <b>Frail</b><br>(n=11,031) |                       |
|-----------------------|-----------------------------|--------------------|-----------------------------------|-----------------------|----------------------------|-----------------------|
|                       | <b>%</b>                    | <b>RRR (95%CI)</b> | <b>%</b>                          | <b>RRR (95%CI)</b>    | <b>%</b>                   | <b>RRR (95%CI)</b>    |
| <b>Fall</b>           |                             |                    |                                   |                       |                            |                       |
| <i>None</i>           | 77.1                        | Reference          | 69.2                              | Reference             | 54.3                       | Reference             |
| <i>Once</i>           | 19.1                        | Reference          | 24.0                              | 1.38 (1.32- 1.42) *** | 30.0                       | 2.05 (1.96- 2.14)***  |
| <i>More than once</i> | 3.9                         | Reference          | 6.9                               | 1.93 (1.78- 2.10) *** | 15.7                       | 5.19 (4.65- 5.79) *** |

Notes: Estimates are adjusted for age, sex and residential clustering.

RRR: relative risk ratio

\*p-value <0.05; \*\*p-value < 0.01; \*\*\*p-value <0.001
